# Supplementary material for: Assessment of selection criteria using multi-year study for effective breeding program of Zingiber officinale L
Source: PeerJ. 2023 Sep 1;11:e15966. doi: 10.7717/peerj.15966 (PMC10476604; doi:10.7717/peerj.15966)
Supplement: Supplemental Information 1 [file peerj-11-15966-s001.xlsx]

## Sheet: Pooled Raw Data
Pedigree	Plant height	No. of tiller	No. of leaf	Leaf length	Leaf width	No. M Rh	No. P Rh	No. S Rh	Int. Weight	Weight M Rh	Weight P Rh	Weight S Rh	Dia M Rh	Dia P Rh	Dia S Rh	Rhizome yield	EO%
Z-4	46.3333	19.2222	14.6667	18.2778	2.04444	2.33333	3.44444	7.11111	0.123333	0.034	0.0577778	0.0315556	9.11111	7.54444	6.34444	0.0882333	0.171111
Z-5	45.1111	16.8889	17.2222	20.7444	1.8	2	4	6.44444	0.102333	0.0465556	0.0356667	0.0201111	8.08889	6.78889	5.81111	0.133444	0.151111
Z-6	55	12.1111	23	22.2222	1.95556	2.22222	3.55556	7.33333	0.145222	0.0447778	0.0627778	0.0376667	8.27778	7.73333	6.58889	0.139222	0.177778
Z-7	50.6667	12.3333	18.7778	14.3556	2.12222	2.22222	3.11111	3.88889	0.118778	0.0246667	0.0677778	0.0263333	7.56667	6.82222	5.31111	0.036	0.367778
Z-8	56	17.7778	17.3333	17.8333	2.36667	2.11111	3.77778	6.55556	0.107778	0.0355556	0.0316667	0.0405556	7.52222	7.23333	6.17778	0.175444	0.208889
Z-9	47.2222	14.7778	15.3333	13.6	1.72222	1.77778	3.33333	6	0.1	0.0328889	0.0322222	0.0348889	7.85556	6.54444	5.33333	0.174778	0.167778
Z-12	47.0556	16.5556	21.8889	17.1778	2	2.22222	3.44444	4.77778	0.0953333	0.0333333	0.0411111	0.0208889	8.9	6.96667	4.92222	0.130222	0.193333
Z-13	49	15.7778	14.2222	14.1133	1.96667	2	3.44444	6	0.243333	0.148333	0.0688889	0.0261111	8.13333	7.88889	5.48889	0.0882333	0.255556
Z-20	51.5556	15.3333	17.6667	21.1778	1.92222	2.66667	4.33333	6.33333	0.0848889	0.0317778	0.0235556	0.0295556	6.82222	6.54444	5.6	0.133444	0.211111
Z-23	59.6667	24.3333	17.2222	17.8333	1.82222	2.44444	4.11111	6	0.109333	0.0265556	0.0533333	0.0294444	7.1	8.32222	5.36667	0.177222	0.242222
Z-24	64	19.8889	22.2222	17.6889	2.18889	2.33333	4.88889	7.22222	0.158556	0.0353333	0.0722222	0.051	8.03333	7.34444	5.73333	0.151	0.166667
Z-36	48.6667	11.2222	14.7778	19.3333	2.17778	1.77778	5.77778	6.88889	0.1	0.0294444	0.0434444	0.0271111	10.3778	7.51111	5.41111	0.0955556	0.151111
Z-37	55.1111	12.4444	16.7778	17.5444	2.23333	2.33333	4.22222	5.55556	0.112111	0.0353333	0.0433333	0.0334444	9.86667	7.68889	5.88889	0.164222	0.133333
Z-41	50.4444	12.7778	17	21.2111	2.45556	2.22222	4.55556	6.88889	0.130778	0.0357778	0.0611111	0.0338889	9.04444	6.14444	5.47778	0.175444	0.22
Z-42	54	16.7778	17.3333	16.8122	2.33333	2.33333	4.66667	6.33333	0.149889	0.0461111	0.0633333	0.0404444	9.05556	7.26667	5.45556	0.174778	0.282222
Z-44	47.6667	13.8889	15.1111	15.9556	2.12222	2.22222	4.33333	6	0.0917778	0.0327778	0.0294444	0.0295556	8.13333	7.55556	4.56667	0.130222	0.17
Z-45	47.7778	11.7778	16.4444	14.1889	2.11111	1.88889	3.22222	7.11111	0.092	0.0234444	0.0466667	0.0218889	8.34444	6.78889	6.5	0.103556	0.186667
Z-53	62.6667	19.5556	21.1111	23.7667	2.36667	2.33333	4.11111	6	0.123	0.0372222	0.0452222	0.0405556	7.78889	7.15556	6.16667	0.133444	0.101111
Z-65	66.1111	18	18.8889	20.0444	2.05556	2.33333	3.33333	4.77778	0.0934444	0.0273333	0.0356667	0.0304444	7.85556	6.95556	5.5	0.139222	0.213333
Z-66	58.8889	15	17.5556	18.4222	2.22222	2.33333	3.66667	6	0.154	0.0388889	0.0633333	0.0517778	7.92222	7.74444	6.01111	0.152556	0.26
Z-68	55.6667	12.3333	16.6667	20.0889	1.93333	2	3.77778	5.88889	0.117	0.0261111	0.0561111	0.0347778	7.82222	7.65556	5.9	0.1747	0.207778
Z-71	51.4444	12	19.6667	18.8222	1.98889	2.55556	3.22222	3.44444	0.0861111	0.0266667	0.0272222	0.0322222	8.72222	7.76667	5.73333	0.241778	0.133333
Z-79	47.6667	15.1111	18.4444	16.7444	2.06667	2.33333	3.77778	5.33333	0.201333	0.139444	0.0383333	0.0235556	7.53333	6.84444	5.42222	0.128111	0.158889
Z-119	52.8889	20.2222	18.4444	19.5222	1.94444	2.22222	4.55556	5.11111	0.0741111	0.0215556	0.03	0.0225556	8.24444	6.25556	5.67778	0.198111	0.204444
Z-120	58.1111	16.3333	17.8889	22.2222	2.12222	2.66667	3.88889	6.11111	0.12	0.0438889	0.0488889	0.0272222	8.7	7.6	5.74444	0.285	0.23
Z-152	50.2222	20.4444	15.4444	17.9889	1.71111	2.11111	3.11111	3.77778	0.132778	0.0422222	0.06	0.0305556	9.25556	6.48889	5.72222	0.0375556	0.377778
Z-157	49.1111	25.1111	16.7778	18.3111	1.83333	2.55556	5.55556	5.11111	0.101667	0.0294444	0.0444444	0.0277778	8.47778	7.07778	5.73333	0.0882333	0.175556
Z-160	55.9444	14.2222	16.4444	17.7667	2	2.22222	3.11111	6.33333	0.141667	0.0361111	0.0666667	0.0388889	8.45556	8.55556	5.32222	0.133444	0.23
Z-162	52.4444	17.8889	15.5556	18.1	2.08889	1.33333	4	7	0.140556	0.0433333	0.0622222	0.035	9.13333	7.55556	5.71111	0.365556	0.0877778
Z-163	55.3333	18.1111	17.3333	19.7444	2.02222	1.22222	4	6.33333	0.113444	0.0311111	0.0473333	0.035	9.63333	8.22222	5.82222	0.200111	0.112222
Z-164	56.4444	16.1111	15.7778	16.6222	1.68889	2.22222	5	6.77778	0.136111	0.0345556	0.0705556	0.031	8.94444	8.35556	6.2	0.178889	0.266667
Z-165	47.2222	15.1111	16.6667	13.9111	1.72222	2.33333	5.11111	6	0.127667	0.0374444	0.06	0.0302222	8.45556	7.04444	5.04444	0.287111	0.301111
Z-170	56	19.2222	20.7778	15.3889	1.83333	2.33333	4.11111	6.33333	0.120222	0.0427778	0.0438889	0.0335556	7.5	6.62222	5.53333	0.133444	0.178889
Z-173	54.6667	16.4444	18.5556	14.3111	1.65556	1.88889	4.66667	4.88889	0.113111	0.0255556	0.0566667	0.0308889	8.25556	7.35556	5.67778	0.139222	0.241111
Z-178	58	25.1667	15.1111	15.4778	1.85556	1.55556	5.66667	11.7778	0.151667	0.0433333	0.0677778	0.0405556	10.0222	7.14444	7.27778	0.152556	0.182222
Z-180	55.4444	15.1111	19	14.4667	2	2	3.44444	5.44444	0.153556	0.0427778	0.0788889	0.0318889	8.44444	7.18889	5.96667	0.130222	0.153333
Z-181	62.3333	15.6667	18.1111	13.9222	1.81111	2.55556	3.88889	7.22222	0.179778	0.0511111	0.0708889	0.0577778	9.87778	8.72222	6.55556	0.196556	0.174444
Z-183	60.7778	13.8889	18	14.1222	1.66667	2.11111	3.55556	5.88889	0.126556	0.0303333	0.0517778	0.0444444	7.54444	8.11111	5.83333	0.0882333	0.185556
Z-184	59.2222	18.5556	18.1111	16.5778	1.76667	1.66667	4.22222	5.88889	0.120556	0.0333333	0.0544444	0.0327778	9.05556	7.01111	5.85556	0.133444	0.223333
Z-187	63	18.5556	19.5556	14.5444	2.22222	1.88889	3.55556	7	0.154556	0.0294444	0.0847778	0.0403333	8.85556	7.16667	6.03333	0.139222	0.188889
Z-189	53.2222	16.3333	17.4444	15.5333	2.06667	2.11111	4	7	0.110556	0.0257778	0.0412222	0.0435556	8.03333	6.08889	5.52222	0.128111	0.212222
Z-191	71.6667	12.5556	20.2222	19.1333	2.03333	1.66667	5	5.22222	0.115111	0.037	0.0423333	0.0357778	7.52222	7.24444	5.74444	0.139222	0.212222
Z-193	48.6667	19.1111	19.7778	15.9	2.05556	2.22222	6.88889	7.22222	0.135	0.0405556	0.0527778	0.0416667	8.25556	7.17778	5.93333	0.0361111	0.382222
Z-194	51	16.7778	17	14.9667	1.97778	2	4	7.44444	0.156778	0.0544444	0.0351111	0.0672222	8.74444	7.13333	6.42222	0.145778	0.156667
Z-200	56.6667	15.8889	17.5556	17.9444	2.42222	2.66667	4.55556	6.77778	0.163222	0.0541111	0.0612222	0.0478889	9.45556	9.34444	6.16667	0.181111	0.108889
Z-201	47.3333	16.1111	18	15.4333	2.06667	2.22222	3.55556	5	0.151667	0.0377778	0.06	0.0538889	8.67778	6.62222	5.86667	0.178889	0.208889
Z-202	51	15.5556	17.4444	17.8333	1.84444	1.88889	4.66667	6.77778	0.144444	0.0405556	0.0478889	0.056	9	7.54444	5.67778	0.146556	0.174444
Z-203	48.8889	20.3333	16	18.1556	2.28889	2.66667	4.55556	6.55556	0.0897778	0.0232222	0.0404444	0.0261111	8.18889	7.05556	5.17778	0.0966667	0.244444
Z-204	48.5556	16.7778	16.4444	15.4556	1.9	2.55556	3.77778	8.55556	0.0986667	0.0275556	0.0333333	0.0377778	7.77778	6.85556	5	0.164222	0.244444
Z-209	62.3333	17.2222	15.6667	16.2	2.02222	1.77778	3.22222	7	0.137222	0.0288889	0.0772222	0.0311111	8.31111	7.55556	5.65556	0.175444	0.136667
Z-210	63.5556	18.2222	15.7778	15.0333	2.16667	2.66667	4.11111	5.77778	0.148333	0.0394444	0.0616667	0.0472222	7.85556	7.16667	6	0.174778	0.17
Z-211	51.2222	18.4444	17.7778	16.1778	2.16667	2.22222	4.44444	7.11111	0.161667	0.0461111	0.06	0.0555556	10.3444	7.44444	5.93333	0.130222	0.178889
Z-212	45.2222	14.2222	15.4444	17.3444	2	1.88889	4.66667	5.11111	4.02544	0.0311111	0.0665556	3.92778	10.2778	7.64444	5.61111	0.103556	0.244444
Z-213	56.3333	19.3333	14.8889	15.9222	2.05556	2	4	5.77778	0.118667	0.0416667	0.0325556	0.0444444	10	7.31111	6.33333	0.174778	0.164444
Z-217	61.3333	17.4444	14.7778	16.9	1.84444	2.77778	2.44444	7.55556	0.115444	0.0287778	0.0334444	0.0532222	9.7	6.88889	5.82222	0.130222	0.193333
Z-219	63.4444	16.3333	16.2222	16.4233	1.85556	2.22222	5.44444	6.88889	0.155556	0.0505556	0.0583333	0.0466667	9.34444	7.74444	6.43333	0.0882333	0.244444
Z-221	52.7778	17.5556	17	16.6222	1.87778	2.88889	6.11111	5.55556	0.132889	0.0344444	0.0495556	0.0488889	8.23333	6.97778	6.34444	0.133444	0.182222
Z-229	51.4444	16	20.3333	15.8667	1.73333	2.88889	4.22222	7.11111	0.144444	0.0322222	0.0805556	0.0316667	8.04444	6.41111	5.01111	0.145778	0.297778
Z-230	41.2222	14	19.6667	18.3889	2.12222	2	3.33333	5.66667	0.177778	0.0362222	0.0632222	0.0783333	8.12222	7.43333	5.64444	0.181111	0.194444
Z-234	55.3333	22.3333	17.5556	16.2667	1.76667	2.44444	3.44444	5.44444	0.13	0.0488889	0.0311111	0.05	8.96667	7.37778	5.37778	0.178889	0.17
Z-237	52.6667	19.1111	16.6667	17.9556	1.63333	2.11111	4.33333	9	0.161778	0.034	0.0777778	0.05	8.46667	7.94444	5.72222	0.146556	0.293333
Z-238	48	23.1111	17.4444	18.7	1.78889	1.33333	3.11111	5.66667	0.148778	0.0432222	0.0422222	0.0633333	8.24444	6.73333	5.1	0.0966667	0.263333
Z-240	48.6667	18.2222	14.3333	14.3333	1.95556	2.22222	6	5.22222	0.143667	0.0397778	0.0513333	0.0525556	9	7.96667	6.32222	0.164222	0.182222
Z-243	54.6667	14.6667	15	15.7333	1.68889	1.77778	5.11111	6	0.101778	0.0323333	0.0372222	0.0322222	8.98889	7.78889	6.06667	0.175444	0.147778
Z-246	55.6667	17	18.4444	15.0667	2.03333	2.33333	4.33333	6.88889	0.135667	0.0438889	0.0423333	0.0494444	9.26667	7.92222	5.85556	0.174778	0.174444
Z-248	57.7778	15.4444	18.8889	14.9556	2.01111	2.44444	8	6.66667	0.127111	0.0273333	0.0475556	0.0522222	8.55556	7.37778	5.73333	0.130222	0.223333
Z-249	54.2222	18.2222	19.3333	15.7222	2.07778	3	4.77778	6.22222	0.126111	0.0333333	0.0544444	0.0383333	10.1556	8.17778	6.85556	0.129667	0.115556
Z-254	60.3333	21.8889	16.8889	15.6556	1.84444	2.88889	3.88889	6.33333	0.210889	0.144444	0.035	0.0314444	6.73333	7.55556	4.92222	0.178556	0.19
Z-256	55.4444	19.3333	17.8889	18.9889	1.88889	2.11111	4.22222	5.88889	0.110667	0.026	0.0457778	0.0388889	8.35556	7.24444	5.63333	0.148111	0.181111
Z-259	44.7778	13.8889	14.8889	17.2556	1.73333	2.11111	5.88889	5.11111	0.172556	0.0418889	0.0644444	0.0662222	8.28889	6.72222	6.02222	0.160444	0.185556
Z-264	45.5556	14.4444	18.7778	13.8444	1.98889	2.33333	4.77778	6.66667	0.109222	0.0422222	0.03	0.037	9.08889	7.52222	4.87778	0.176667	0.27
Z-266	62.1111	20.6667	16.2222	16.2889	2.04444	2	4.33333	6.22222	0.131889	0.0344444	0.0683333	0.0291111	9.17778	7.12222	5.43333	0.175	0.226667
Z-268	60	22.2222	18.8889	21.9	1.64444	2.44444	4.22222	5.22222	0.112	0.035	0.05	0.027	8.27778	6.18889	5.3	0.129111	0.241111
Z-269	54.2222	16.1111	17.2222	17.7444	1.64444	2.11111	4.77778	4.77778	0.157556	0.0416667	0.075	0.0408889	9.36667	8.05556	5.87778	0.0936667	0.208889
Z-270	55.1111	22.3333	16.4444	15.4778	1.54444	3.22222	5.22222	6.33333	0.110444	0.03	0.0477778	0.0326667	7.96667	6.66667	5.28889	0.174778	0.125556
Z-271	48.3333	18.4444	15.8889	16.3556	1.87778	2.77778	5.77778	8.77778	0.121556	0.0345556	0.0433333	0.0436667	8	6.62222	4.96667	0.130222	0.218889
Z-278	56.6667	17.7778	17.2222	17.7556	2.12222	3.33333	4.88889	7	0.136444	0.033	0.055	0.0484444	8.54444	6.57778	5.84444	0.129667	0.223333
Z-284	59.6667	17.6667	20.8889	20.5778	1.96667	2.33333	4.88889	4.66667	0.138889	0.0338889	0.0472222	0.0577778	8.77778	8.26667	6.02222	0.178556	0.233333
Z-293	63.1111	18.2222	17.6667	16.8556	1.72222	2.22222	4.66667	5.55556	0.121778	0.0333333	0.049	0.0394444	9.21111	7.03333	6.12222	0.148111	0.27
Z-294	56.6667	14.4444	17.5556	19.5	1.9	2	4.22222	6.22222	0.107556	0.0338889	0.0425556	0.0311111	8.11111	7.97778	5.73333	0.0882333	0.177778
Z-295	66.8889	17	17.7778	16.2778	1.85556	2.33333	5	4.33333	0.112	0.0427778	0.0411111	0.0281111	8.07778	7.04444	5.51111	0.133444	0.182222
Z-300	46.3333	13.5556	17.6667	17.0111	2.14444	2.33333	4.22222	4.77778	0.108444	0.0488889	0.0355556	0.024	7.75556	6.43333	5.47778	0.139222	0.277778
Z-304	45.2222	16.7778	16.1111	15.3789	1.93333	2.44444	4.88889	6.11111	0.129333	0.0494444	0.0405556	0.0393333	7.61111	6.91111	5.95556	0.175444	0.282222
Z-317	47.5556	18.6667	18.6667	16.7	1.94444	2.22222	5.77778	5.22222	0.123667	0.0311111	0.065	0.0275556	7.6	6.34444	5.81111	0.174778	0.271111
Z-336	55.3333	15.8889	19.4444	16.4333	1.91111	2.33333	4.22222	4.44444	0.129556	0.0266667	0.0522222	0.0506667	8.45556	6.98889	6.2	0.130222	0.177778
Z-342	58.8889	21	20.6667	21.1111	2.13333	2.11111	3.66667	5.66667	0.160889	0.0305556	0.0786667	0.0516667	8.41111	7.3	5.98889	0.114444	0.215556
Z-343	54.6667	21.7778	18.6667	16.9667	1.93333	3.22222	5	8.22222	0.127333	0.0372222	0.0384444	0.0516667	8.47778	7.34444	6.18889	0.190667	0.178889
Z-344	49	20.3333	16.1111	17.2556	1.84444	1.88889	4.88889	5.11111	0.123333	0.0344444	0.05	0.0388889	7.82222	7.62222	5.96667	0.178556	0.282222
Z-356	51.7222	21.5556	18.5556	17.3111	2.08889	2.11111	4.88889	6.33333	0.174222	0.0344444	0.0781111	0.0616667	8.62222	7.16667	6.31111	0.161444	0.193333
Z-363	48.6667	19.8889	15.8889	17.7778	2.07778	1.77778	4.11111	5.88889	0.133889	0.0338889	0.0611111	0.0388889	8.94444	7.42222	6.17778	0.0964444	0.166667
Z-370	51.3333	16.7778	15.1111	19.8778	2.08889	2.33333	4.55556	7	0.137778	0.0522222	0.0538889	0.0316667	10.3111	8.61111	5.94444	0.149556	0.13
Z-374	54.1111	18.3333	19.5556	17.9444	2.18889	2.66667	3.44444	6.33333	0.165556	0.0483333	0.0772222	0.04	9.42222	8.51111	6.65556	0.174111	0.123333
Z-381	54	20.3333	16.8889	14.3667	2.36667	2.11111	3.88889	5.33333	0.094	0.0305556	0.0373333	0.0261111	9.85556	6.68889	5.13333	0.177222	0.185556
Z-385	50.8889	13.1111	18.7778	13.9444	1.78889	2.33333	4.55556	6.44444	0.127111	0.0338889	0.0484444	0.0447778	8.05556	7.76667	4.83333	0.151	0.156667
Z-388	51.3333	16.5556	20.1111	14.3111	2.04444	2.55556	5.55556	7.44444	0.182222	0.0355556	0.0833333	0.0633333	7.88889	7.37778	5.35556	0.0962222	0.288889
Z-391	50.3333	13.5556	16.3333	17.3667	2.02222	2.44444	3.88889	5.55556	0.120111	0.0327778	0.0434444	0.0438889	8.48889	8.3	5.6	0.103556	0.182222
Z-398	59.2778	19.3333	17.4444	14.3222	1.96667	2.22222	4.33333	6.77778	0.115111	0.0288889	0.0428889	0.0433333	8.52222	7.17778	5.48889	0.161333	0.245556
Z-413	41.6667	14.5556	14.2222	14.8778	1.86667	1.33333	3.44444	4.55556	0.114444	0.0277778	0.0477778	0.0388889	7.15556	7.36667	6.05556	0.151	0.223333
Z-417	58.3333	11.7778	16.4444	14.0333	1.9	2.66667	10.8889	7.11111	0.187778	0.0511111	0.0733333	0.0633333	7.44444	8.1	6.41111	0.0871111	0.182222
Z-422	50.6667	17.2222	17.2222	21.2	2.01111	2.22222	4	5.66667	0.124556	0.0226667	0.0661111	0.0357778	7.78889	6.72222	5.54444	0.119567	0.182222
Z-424	56.3333	19.5556	19.3333	21.0222	1.84444	2.55556	4.44444	7.77778	0.149778	0.0405556	0.065	0.0442222	8.8	6.67778	5.45556	0.169	0.174444
Z-427	69	18.8889	19.7778	16.9333	2.01111	2.44444	4.22222	5.11111	0.128889	0.0305556	0.0661111	0.0322222	9.24444	7.4	6.07778	0.151	0.162222
Z-428	51.6667	19.1111	18.4444	17.7556	2.16667	2.88889	6	6.55556	0.0925556	0.0266667	0.0386667	0.0272222	8.74444	7.33333	5.73333	0.0871111	0.247778
Z-429	61.8889	144	20.2222	17.0556	2.13333	2.33333	5.44444	5.77778	0.0804444	0.0244444	0.0284444	0.0275556	8.84444	7.86667	5.95556	0.119567	0.263333
Z-432	55.7778	21.2222	17.6667	19	2.06667	1.55556	4.66667	4.55556	0.141556	0.0335556	0.0844444	0.0235556	8.18889	6.92222	5.71111	0.129667	0.201111
Z-435	50.7778	21.3333	18.6667	15.2344	1.75556	1.88889	5.77778	5.77778	0.100444	0.03	0.0434444	0.027	9.18889	6.46667	6.73333	0.190667	0.218889
Z-438	59.8889	18.2222	17.7778	19.8556	1.92222	2.44444	6.11111	6	0.135667	0.035	0.0672222	0.0334444	9.48889	8.02222	6.07778	0.178556	0.248889
Z-439	57	17.6667	19.6667	15.8333	1.82222	2.11111	4.77778	4.44444	0.110333	0.0256667	0.0551111	0.0295556	7.18889	6.67778	5.88889	0.148111	0.162222
Z-441	50.2222	13.3333	16.3333	21.2889	2.2	3	4.22222	5.33333	0.0817778	0.0303333	0.0275556	0.0238889	7.64444	7.03333	4.9	0.160444	0.182222
Z-442	59.2222	19.5556	15.8889	19.2556	1.91111	2.88889	4.22222	6.11111	0.154444	0.0405556	0.0688889	0.045	7.93333	7.42222	5.4	0.176667	0.19
Z-443	59.1111	16.4444	18	19.0333	2.14444	2.55556	5.33333	5.66667	0.155444	0.0466667	0.0405556	0.0682222	8.45556	7.74444	5.74444	0.175	0.196667
Z-444	50.1111	16.8889	19.2222	22.1889	1.7	2.88889	4.55556	5.11111	0.0995556	0.0317778	0.0418889	0.0258889	8.74444	6.73333	5.25556	0.129111	0.123333
Z-446	52.1111	13.3333	19	18.2889	1.68889	2	4.66667	4.88889	0.171111	0.0508889	0.0747778	0.0454444	9.22222	7.14444	6.31111	0.175444	0.178889
Z-453	66.1111	13.8889	18.1111	14.8111	1.85556	2	4.55556	6.44444	0.144222	0.0342222	0.0688889	0.0411111	7.84444	6.8	5.4	0.174778	0.237778
Z-457	59.4444	16.5556	17.2222	15.0556	2.08889	2.77778	4.44444	5.88889	0.141778	0.0434444	0.0577778	0.0405556	9.2	7.64444	5.86667	0.130222	0.174444
Z-459	58.8889	23.8889	19.6667	22.8778	2.17778	2.44444	4.33333	7	0.202222	0.0405556	0.0933333	0.0683333	7.55556	8.41111	5.95556	0.129667	0.16
Z-463	51.3333	20	17.1111	18.0222	1.64444	2.55556	5.77778	7.22222	0.145667	0.0277778	0.0715556	0.0463333	7.54444	7.4	5.12222	0.178556	0.141111
Z-464	47.2222	15	16.1111	16.8111	1.64444	1.88889	3.33333	5.44444	0.0771111	0.03	0.0266667	0.0204444	8.68889	6.47778	5.47778	0.148111	0.174444
Z-466	56.1111	18.5556	16.4444	18.5889	1.94444	2	4.33333	5.77778	0.122222	0.0216667	0.0578889	0.0426667	9	7.13333	5.77778	0.160444	0.234444
Z-467	55.4444	16.2222	15.4444	16.2667	1.95556	2.22222	3.88889	6.33333	0.118778	0.028	0.0566667	0.0341111	8.77778	8.45556	5.15556	0.176667	0.226667
Z-469	54.4444	29.2222	19	16.5667	2.1	1.55556	4	5.11111	0.0983333	0.0333333	0.0428889	0.0221111	9.52222	7.53333	5.96667	0.0367778	0.386667
Z-470	54.8889	27.2222	18.2222	15.6556	2.05556	2.44444	6	7.22222	0.153889	0.03	0.0577778	0.0661111	7.81111	7.2	5.76111	0.145778	0.241111
Z-472	48.2222	19	18.5556	17.8222	1.68889	2.55556	4.88889	7	0.0835556	0.0263333	0.0305556	0.0266667	8.47778	8.08889	5.15556	0.181111	0.144444
Z-479	60.8889	18.8889	20.7778	15.3	1.73333	2.66667	5	7.33333	0.123111	0.0342222	0.0583333	0.0305556	8.03333	7.2	5.21111	0.178889	0.244444
Z-481	56.1111	16.4444	18.2222	17.2556	1.93333	1.77778	5.88889	6.66667	0.173333	0.0327778	0.0916667	0.0488889	8.26667	7.35556	6.25556	0.146556	0.275556
Z-482	60.2222	22.6667	16.6667	16.2556	2.17778	2.22222	3.88889	4.44444	0.0998889	0.0305556	0.0371111	0.0322222	8.4	8.12222	5.96667	0.0966667	0.212222
Z-483	52.4444	23.4444	18.3333	14.8889	1.95556	3.11111	4.88889	7	0.0983333	0.0254444	0.0411111	0.0317778	8.47778	7.97778	6.07778	0.164222	0.145556
Z-488	38.6667	16.2222	15.7778	16.5444	2	2.33333	5.22222	6.44444	0.101667	0.0388889	0.0433333	0.0194444	7.8	6.7	5.22222	0.175444	0.274444
Z-496	57.4444	26.4444	16.4444	18.1111	2.1	1.77778	3.33333	5.22222	0.140778	0.0405556	0.0761111	0.0241111	8.78889	7.81667	5.33333	0.174778	0.242222
Z-497	52.2222	15.6667	16.6667	14.5889	2.06667	2.55556	4	6.44444	0.0787778	0.0282222	0.0255556	0.025	7.15556	7.27778	5.28889	0.130222	0.226667
Z-501	52.2222	16.2222	19	14.1778	2.24444	3.11111	4.88889	6.11111	0.141889	0.0477778	0.0577778	0.0363333	7.9	8.47778	5.96667	0.103556	0.155556
Z-506	58.1111	27	22	16.3111	2.04444	2	4.55556	5.88889	0.16	0.04	0.0566667	0.0633333	7.65556	8.46667	5.93333	0.119567	0.107778
Z-508	56.2222	27.6667	17.8889	16.9778	1.87778	2.22222	4.22222	6.22222	0.126222	0.0366667	0.0358889	0.0536667	9.38889	8.26667	6.73333	0.169	0.126667
Z-518	47.3333	31.8889	17.8889	13.8222	2.07778	1.44444	4.55556	5.77778	0.104	0.0356667	0.0416667	0.0266667	9.36667	7.42222	6.12222	0.151	0.19
Z-519	57	27.4444	18.1111	16.3222	1.87778	2.44444	4.22222	5.22222	0.159667	0.0441111	0.0627778	0.0527778	8.98889	7.43333	6.4	0.0871111	0.19
Z-525	30.1111	19.3333	15.3333	13.6	1.73333	2.22222	3.55556	5.22222	0.144111	0.05	0.0496667	0.0444444	8.82222	7.37778	5.86667	0.119567	0.182222
Z-529	48.8889	21.7778	16.8889	16.1111	2.22222	2.22222	4.22222	6	0.105	0.0305556	0.0294444	0.045	8.17778	7.21111	5.58889	0.129667	0.271111
Z-531	46.7778	19.7778	18.2222	15.0333	1.97778	2.77778	4.77778	6.33333	0.13	0.0283333	0.0661111	0.0355556	8.32222	7.56667	5.78889	0.190667	0.29
Z-534	51	17.7778	15.7778	14.5222	1.71111	1.88889	7.22222	7	0.139111	0.0287778	0.0705556	0.0397778	8.67778	6.48889	4.63333	0.145778	0.211111
Z-535	49.2222	20.3333	20.5556	17.3222	1.94444	2.11111	4.44444	4.22222	0.111333	0.0405556	0.0461111	0.0246667	9.51111	7.66667	6.13333	0.181111	0.274444
Z-550	52.7778	21.3333	18	13.7556	1.86667	1.88889	4.88889	4.77778	0.152556	0.0461111	0.0755556	0.0308889	9.86667	7.97778	6.02222	0.178889	0.241111
Z-566	51.1111	21.8889	16.7778	12.6222	1.51111	2.44444	4.11111	6.33333	0.104111	0.0283333	0.0408889	0.0348889	7.64444	7.07778	5.04444	0.0365556	0.374444
Z-577	47.3333	15.1111	17.2222	17.9333	1.85556	2.22222	4	5.77778	0.107333	0.0294444	0.034	0.0438889	7.78889	6.41111	5.54444	0.161333	0.204444
Z-582	56.8889	21.5556	18.7778	16.0778	1.74444	3	6.22222	8.55556	0.213222	0.0477778	0.0911111	0.0743333	7.98889	6.41111	5.58889	0.151	0.258889
Z-583	67.5556	30	19.4444	22.4444	2.1	2.66667	3.88889	5.55556	0.124889	0.0333333	0.0588889	0.0326667	9.73333	8	5.72222	0.0871111	0.231111
Z-598	53	19	18.8889	16.9667	1.66667	2.22222	3.22222	5.77778	0.122222	0.0338889	0.045	0.0433333	8.15556	6.74444	5.62222	0.119567	0.245556
Z-601	49.2222	16.7778	19.6667	17.8333	1.58889	2.22222	4	6.33333	0.143889	0.0405556	0.0588889	0.0444444	8.26667	7.57778	5	0.169	0.207778
Z-603	47	15.2222	14	15.8333	1.77778	2.55556	4.55556	6	0.126111	0.0288889	0.0638889	0.0333333	8.66667	7.77778	6.16111	0.151	0.208889
Z-604	53.6667	17.6667	18.1111	18.2333	2.05556	2.44444	3.66667	5.66667	0.133889	0.0311111	0.065	0.0377778	7.88889	8.02222	6.41111	0.0871111	0.223333
Z-605	59.3333	18.5556	17.5556	17.1567	1.82222	2.33333	5.22222	5.88889	0.158222	0.0366667	0.08	0.0415556	8.3	7.14444	5.76667	0.119567	0.234444
